# Supplementary material for: Effects of Resistant Starch on Symptoms, Fecal Markers, and Gut Microbiota in Parkinson’s Disease — The RESISTA-PD Trial
Source: PubMed Central journal article supplement (PMC9684155; doi:10.1016/j.gpb.2021.08.009), 2021-11-25

A) MetaPhlan2 Alpha-diversity

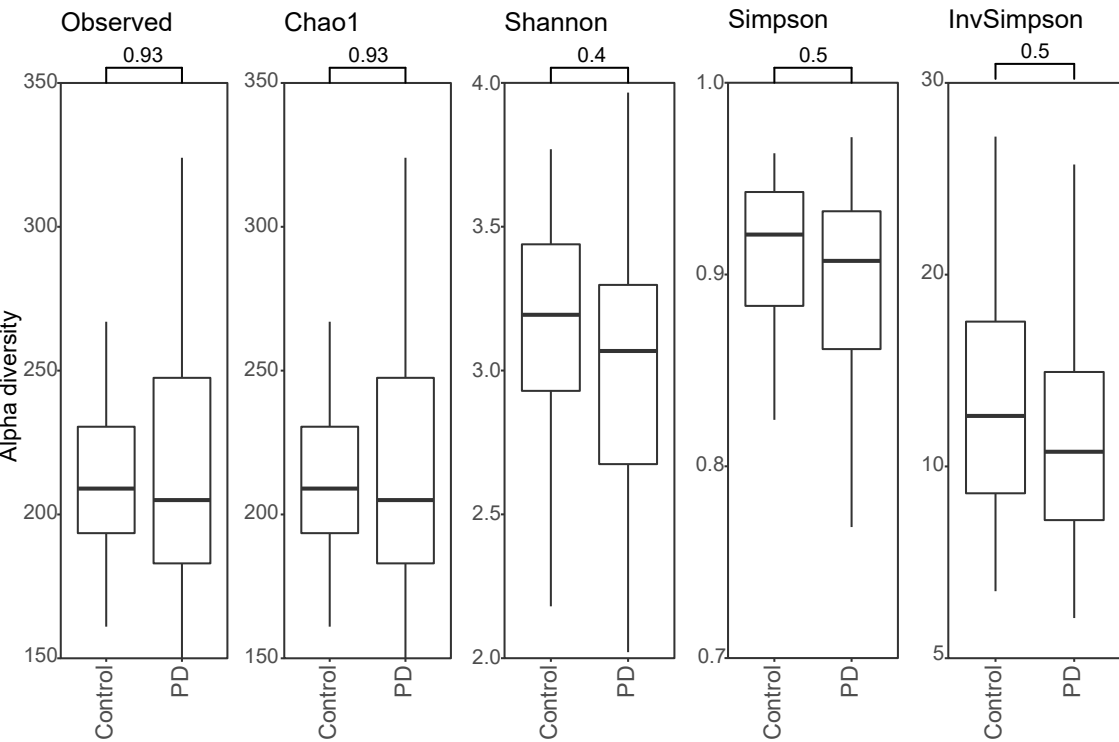

C) MetaPhlan2 Beta-diversity

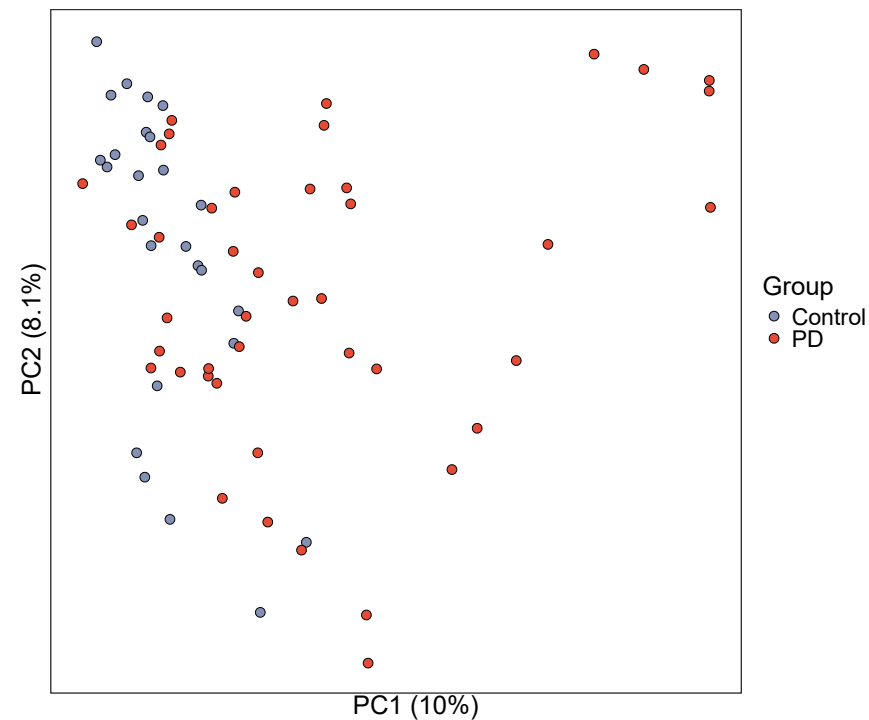

B) mOTUs2 Alpha-diversity

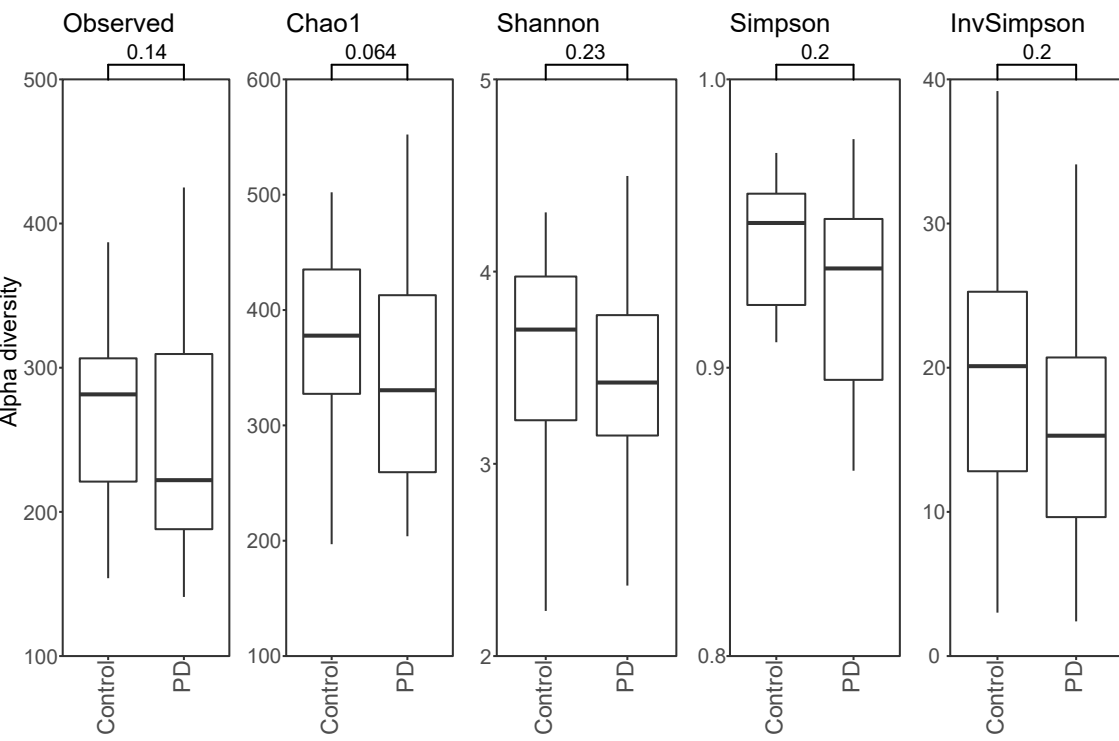

D) mOTUs2 Beta-diversity

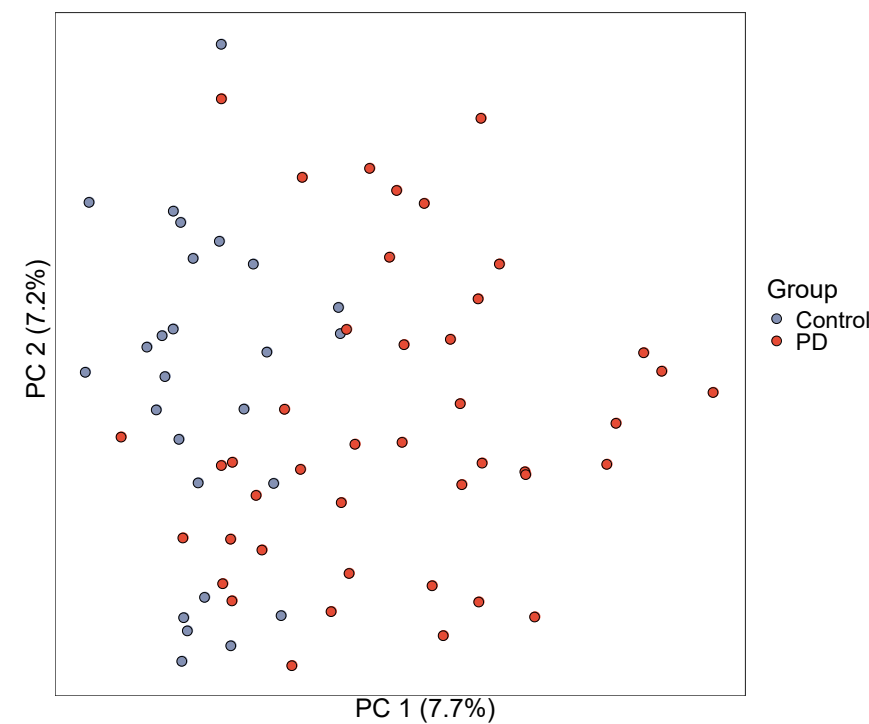

Supplement: mmc2.pdf [file mmc2.pdf]
